# Supplementary material for: The role of mesenchymal cells in cholangiocarcinoma
Source: PubMed Central journal article supplement (PMC11655028; doi:10.1242/dmm.050716), 2024-12-13
Supplement: dmm-17-050716-s1.pdf [file dmm-17-050716-s1.pdf]

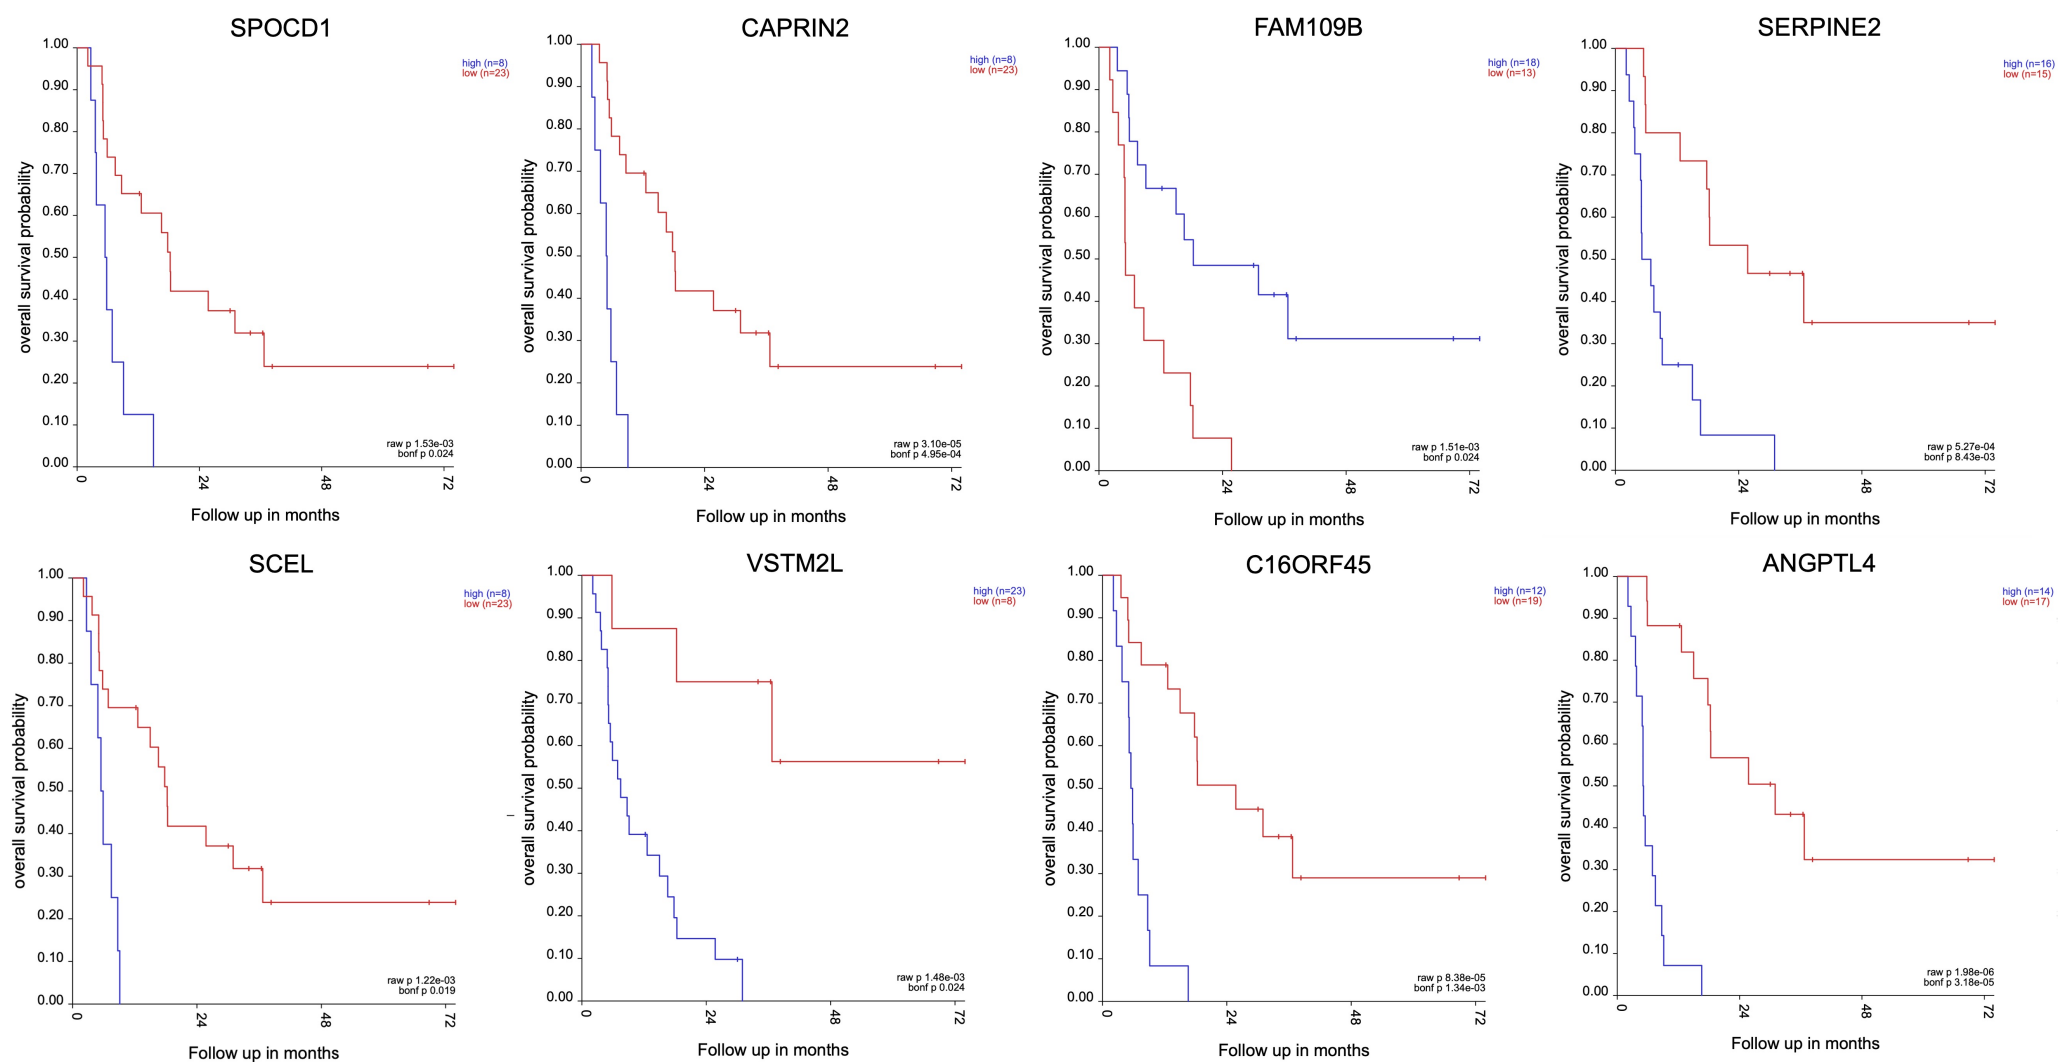

**Fig. S1. Kaplan–Meier survival analysis of genes differentially expressed in co-culture model.** Kaplan-Meier survival analysis was performed to assess the impact of gene expression on overall survival using dataset [GSE89749](#) (33). The analysis focused on a subset of samples from patients with anatomic subtype, intrahepatic location, and fluke positive status to match the characteristics of KKKU-M213.

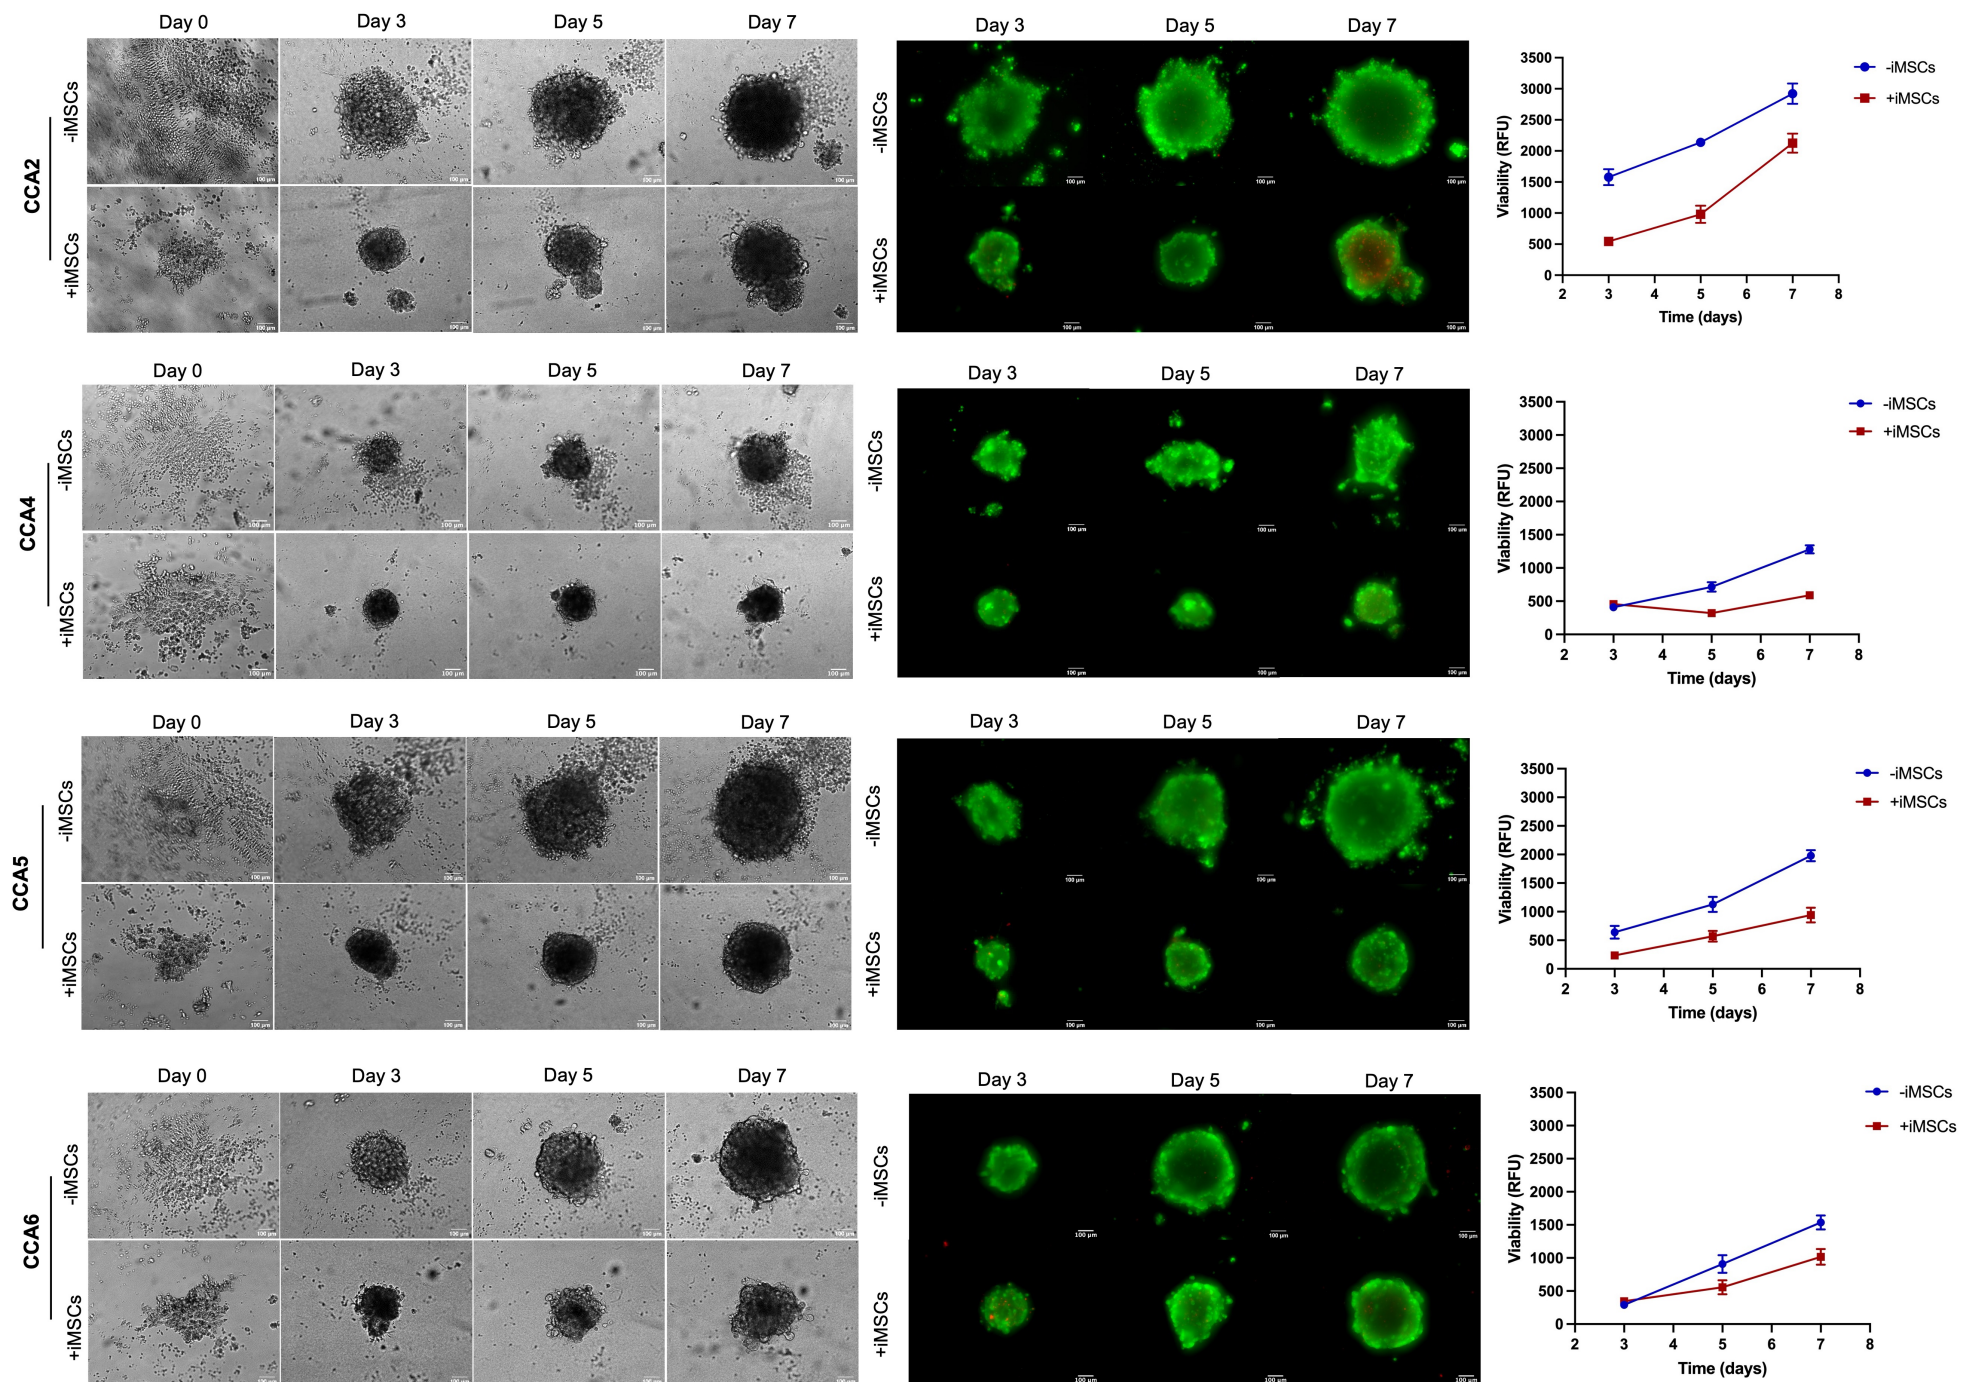

**Fig. S2. Poorly-differentiated PDX-derived spheroids as monocultures and iMSCs co-cultures.** CCA tissues (CCA2 (A), CCA4 (B), CCA5 (C) and CCA6 (D)) were enzymatically dissociated, and the cells were mono- or iMSCs co-cultured at 1:2 ratio (cancer cells:iMSCs) into an ULA 96-well round bottom plate at a final cell density of 1000 cells per well with 300 $\mu$ g/mL of basement membrane extract (BME). The effect of co-culture with iMSCs was assessed using brightfield microscopy at day 0, 3, 5 and 7 at 10x magnification. Live/dead cell staining was carried out using Calcein acetoxymethyl (AM) (green - live cells staining) and EthD-1 (red - dead cells staining) at days 3, 5 and 7. Representative spheroids are shown. Scale bar 100 $\mu$ m. Viability was monitored by PrestoBlue at day 3, 5 and 7 (Mean  $\pm$  SEM).

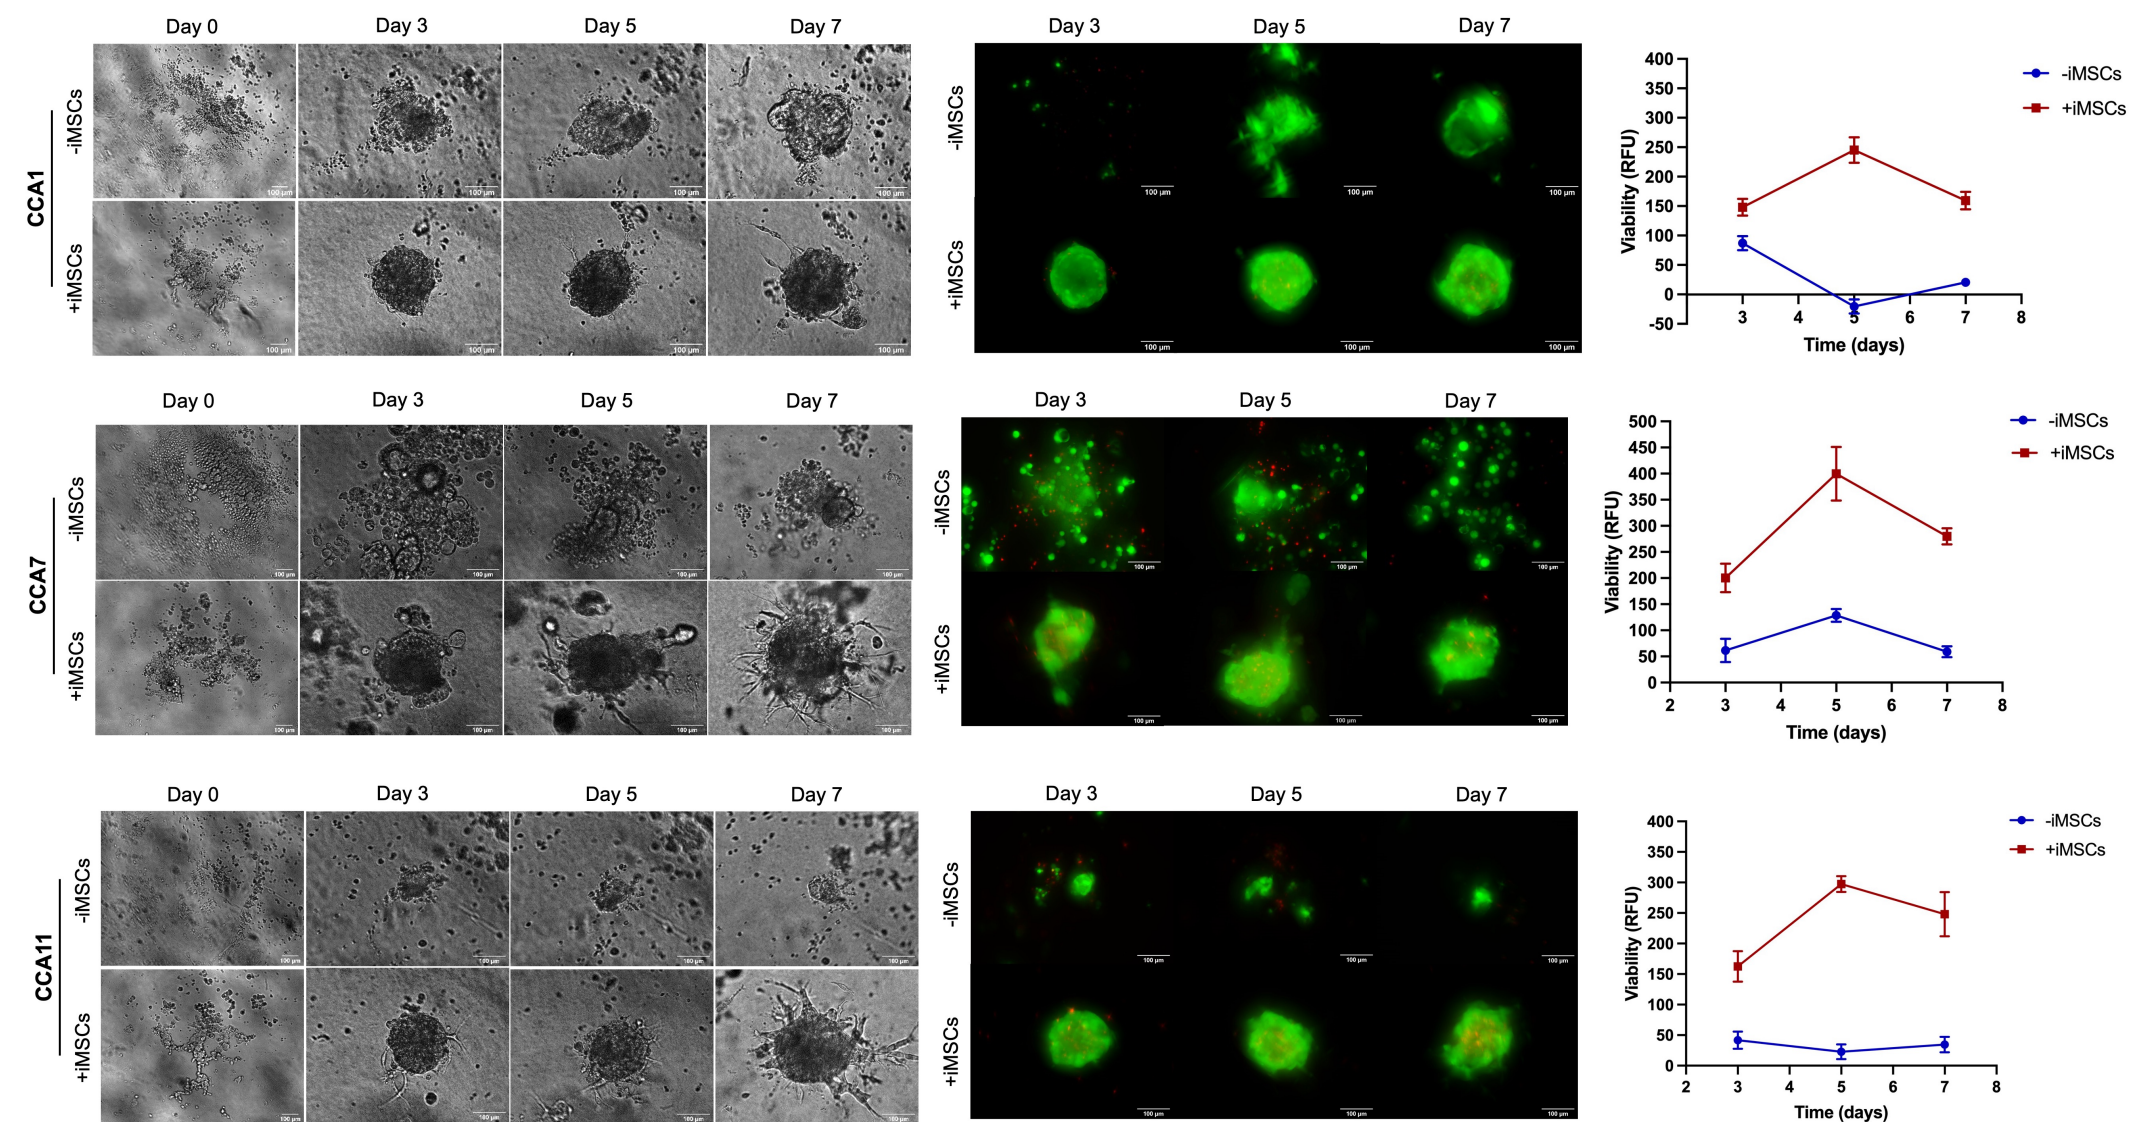

**Fig. S3. Well-differentiated PDX-derived spheroids as monocultures and iMSCs co-cultures.** CCA tissues (CCA1 (A), CCA7 (B) and CCA11 (C)) were enzymatically dissociated, and the cells were mono- or iMSCs co-cultured at 1:2 ratio (cancer cells:iMSCs) into an ULA 96-well round bottom plate at a final cell density of 1000 cells per well with 300 $\mu$ g/mL of basement membrane extract (BME). The effect of co-culture with iMSCs was assessed using brightfield microscopy at day 0, 3, 5 and 7 at 10x magnification. Live/dead cell staining was carried out using Calcein acetoxymethyl (AM) (green - live cells staining) and EthD-1 (red - dead cells staining) at days 3, 5 and 7. Representative spheroids are shown. Scale bar 100 $\mu$ m.

**Table S1. Canonical pathways associated with cancer that were significantly dysregulated comparing patient tissues to PDXs.**

| Ingenuity Canonical Pathways                    | <b>-log(p-value)</b> | <b>Ratio</b> | <b>z-score</b> |
|-------------------------------------------------|----------------------|--------------|----------------|
| <b>S100 Family Signaling Pathway</b>            | 14.9                 | 0.28         | 9.54           |
| <b>FAK Signaling</b>                            | 11.7                 | 0.27         | 9.70           |
| <b>PD-1, PD-L1 cancer immunotherapy pathway</b> | 8.25                 | 0.40         | -3.53          |
| <b>Tumor Microenvironment Pathway</b>           | 6.39                 | 0.31         | 5.98           |
| <b>Molecular Mechanisms of Cancer</b>           | 6.38                 | 0.22         | 9.99           |
| <b>Breast Cancer Regulation by Stathmin1</b>    | 4.74                 | 0.23         | 8.63           |
| <b>Cachexia Signaling Pathway</b>               | 4.5                  | 0.24         | 4.57           |
| <b>HOTAIR Regulatory Pathway</b>                | 2.43                 | 0.24         | 2.83           |
| <b>Role of Tissue Factor in Cancer</b>          | 2.34                 | 0.22         | 6.03           |
| <b>SPINK1 Pancreatic Cancer Pathway</b>         | 2.31                 | 0.33         | -3.05          |
| <b>ID1 Signaling Pathway</b>                    | 1.71                 | 0.21         | 2.60           |
| <b>Colorectal Cancer Metastasis Signaling</b>   | 1.7                  | 0.20         | 5.28           |
| <b>PTEN Signaling</b>                           | 1.53                 | 0.21         | -2.68          |
| <b>BEX2 Signaling Pathway</b>                   | 1.46                 | 0.24         | 2.00           |
| <b>Thyroid Cancer Signaling</b>                 | 1.45                 | 0.24         | 3.15           |
| <b>PCP (Planar Cell Polarity) Pathway</b>       | 1.42                 | 0.25         | 2.31           |
| <b>HEY1 Signaling Pathway</b>                   | 1.3                  | 0.21         | 2.41           |

**Table S2. List of upstream regulators identified through Ingenuity Pathway Analysis (IPA) analysis, including growth factors (GF), cytokines, kinases, and transcription regulators (TR).**

Available for download at

<https://journals.biologists.com/dmm/article-lookup/doi/10.1242/dmm.050716#supplementary-data>

**Table S3. Inhibited cancer-associated kinases (ICAKs) identified in PDX models.**

| Upstream Regulator | Expr Log Ratio | Expression (PDX vs PT) | Molecule Type | Predicted Activation State | Activation z-score | p-value of overlap |
|--------------------|----------------|------------------------|---------------|----------------------------|--------------------|--------------------|
| EPHA2              | -1.94          | 3.85                   | kinase        | Activated                  | 2.16               | 6.34E-05           |
| MET                | -1.88          | 3.69                   | kinase        | Activated                  | 3.19               | 3.60E-08           |
| MST1R              | -1.72          | 3.29                   | kinase        | Activated                  | 2.80               | 6.54E-03           |
| MAP3K21            | -1.66          | 3.16                   | kinase        | Activated                  | 2.00               | 2.26E-02           |
| TYRO3              | -1.52          | 2.87                   | kinase        | Activated                  | 2.41               | 3.72E-06           |
| PRKCZ              | -1.35          | 2.55                   | kinase        | Activated                  | 3.39               | 6.32E-04           |
| EIF2AK2            | -1.05          | 2.07                   | kinase        | Activated                  | 3.21               | 1.54E-02           |
| RET                | -0.97          | 1.95                   | kinase        | Activated                  | 2.28               | 2.15E-07           |
| CHUK               | -0.87          | 1.83                   | kinase        | Activated                  | 6.10               | 6.93E-19           |
| CDK6               | -0.82          | 1.76                   | kinase        | Activated                  | 2.24               | 7.59E-02           |
| CAMK2D             | -0.66          | 1.58                   | kinase        | Activated                  | 2.00               | 2.56E-02           |
| CDK5               | -0.62          | 1.53                   | kinase        | Activated                  | 2.76               | 1.11E-05           |
| EPHB4              | -0.47          | 1.38                   | kinase        | Activated                  | 3.19               | 2.77E-03           |
| PTK2               | -0.44          | 1.35                   | kinase        | Activated                  | 3.45               | 2.42E-07           |
| PAK1               | -0.31          | 1.24                   | kinase        | Activated                  | 2.21               | 2.55E-01           |
| IRAK1              | -0.31          | 1.24                   | kinase        | Activated                  | 2.36               | 4.68E-04           |
| TBK1               | -0.29          | 1.22                   | kinase        | Activated                  | 3.03               | 7.47E-04           |
| PDK1               | -0.27          | 1.20                   | kinase        | Activated                  | 4.23               | 6.01E-03           |
| MAP2K3             | -0.23          | 1.17                   | kinase        | Activated                  | 3.26               | 3.58E-03           |
| MAP2K1             | -0.18          | 1.13                   | kinase        | Activated                  | 3.51               | 1.29E-11           |
| RIPK2              | -0.11          | 1.08                   | kinase        | Activated                  | 5.39               | 1.54E-04           |
| MAPK8              | -0.08          | 1.05                   | kinase        | Activated                  | 4.22               | 2.22E-08           |
| MAPK9              | -0.03          | 1.02                   | kinase        | Activated                  | 2.90               | 1.33E-06           |
| MAPK14             | -0.02          | 1.01                   | kinase        | Activated                  | 4.48               | 1.51E-18           |
| PRKACA             | 0.07           | 0.95                   | kinase        | Activated                  | 2.03               | 2.18E-04           |
| HK2                | 0.09           | 0.94                   | kinase        | Activated                  | 2.24               | 1.52E-01           |
| IKBKG              | 0.10           | 0.93                   | kinase        | Activated                  | 4.97               | 1.34E-13           |
| SRC                | 0.10           | 0.93                   | kinase        | Activated                  | 2.29               | 1.94E-07           |
| RPS6KA5            | 0.11           | 0.93                   | kinase        | Activated                  | 2.12               | 3.34E-04           |
| MAPK11             | 0.12           | 0.92                   | kinase        | Activated                  | 2.81               | 1.25E-02           |
| RAF1               | 0.15           | 0.90                   | kinase        | Activated                  | 2.94               | 3.33E-06           |
| IPMK               | 0.16           | 0.90                   | kinase        | Activated                  | 4.12               | 7.18E-06           |
| PRKCD              | 0.19           | 0.88                   | kinase        | Activated                  | 3.61               | 3.43E-08           |
| TYK2               | 0.20           | 0.87                   | kinase        | Activated                  | 3.02               | 4.09E-08           |
| CDK9               | 0.23           | 0.85                   | kinase        | Activated                  | 2.79               | 2.66E-09           |
| AKT1               | 0.25           | 0.84                   | kinase        | Activated                  | 2.60               | 2.81E-18           |
| MAPK3              | 0.26           | 0.84                   | kinase        | Activated                  | 4.07               | 3.93E-08           |
| ROCK1              | 0.28           | 0.83                   | kinase        | Activated                  | 3.97               | 9.44E-08           |
| IKBKB              | 0.31           | 0.80                   | kinase        | Activated                  | 6.44               | 1.25E-26           |
| MAP3K14            | 0.37           | 0.78                   | kinase        | Activated                  | 3.12               | 1.68E-07           |
| DYRK1A             | 0.39           | 0.77                   | kinase        | Activated                  | 2.31               | 1.18E-05           |
| PRKCE              | 0.46           | 0.72                   | kinase        | Activated                  | 3.60               | 1.37E-07           |
| MAP3K1             | 0.49           | 0.71                   | kinase        | Activated                  | 2.81               | 1.35E-04           |
| MKNK1              | 0.65           | 0.64                   | kinase        | Activated                  | 4.80               | 5.93E-05           |
| ROR1               | 0.77           | 0.58                   | kinase        | Activated                  | 3.20               | 3.20E-03           |
| CAMK4              | 0.79           | 0.58                   | kinase        | Activated                  | 2.77               | 1.77E-03           |

**Table S4. Upstream regulators and inhibited cancer-associated kinases (ICAKs) identified in the well-differentiated group.**

| Upstream Regulator | Expr Log Ratio | Expression (PDX vs PT) | Molecule Type | Predicted Activation State | Activation z-score | p-value of overlap |
|--------------------|----------------|------------------------|---------------|----------------------------|--------------------|--------------------|
| ACVR1C             | 4.72           | 26.32                  | kinase        | Inhibited                  | 2.43               | 9.12E-02           |
| RET                | 1.91           | 3.76                   | kinase        | Inhibited                  | 3.13               | 2.15E-07           |
| HK2                | 1.71           | 3.27                   | kinase        | Inhibited                  | 2.00               | 3.72E-01           |
| TYRO3              | 1.65           | 3.13                   | kinase        | Inhibited                  | 2.20               | 2.79E-03           |
| CAMK2D             | 1.38           | 2.61                   | kinase        | Inhibited                  | 2.00               | 4.02E-02           |
| CHUK               | 1.29           | 2.44                   | kinase        | Inhibited                  | 5.13               | 5.97E-15           |
| PRKCZ              | 1.24           | 2.36                   | kinase        | Inhibited                  | 2.60               | 1.40E-02           |
| CAMK4              | 1.06           | 2.09                   | kinase        | Inhibited                  | 3.23               | 1.24E-03           |
| RIPK2              | 1.04           | 2.06                   | kinase        | Inhibited                  | 2.94               | 4.52E-05           |
| MAPK11             | 0.94           | 1.92                   | kinase        | Inhibited                  | 2.16               | 7.27E-03           |
| CDK5               | 0.90           | 1.87                   | kinase        | Inhibited                  | 2.27               | 2.13E-04           |
| PDK1               | 0.76           | 1.69                   | kinase        | Inhibited                  | 3.13               | 2.10E-03           |
| PTK2               | 0.71           | 1.64                   | kinase        | Inhibited                  | 3.17               | 1.25E-06           |
| IKBKG              | 0.71           | 1.63                   | kinase        | Inhibited                  | 4.76               | 1.44E-11           |
| EPHB4              | 0.59           | 1.51                   | kinase        | Inhibited                  | 2.85               | 6.43E-04           |
| PRKACA             | 0.53           | 1.44                   | kinase        | Inhibited                  | 2.44               | 3.82E-05           |
| MAP2K1             | 0.53           | 1.44                   | kinase        | Inhibited                  | 2.69               | 3.60E-14           |
| MAPK8              | 0.49           | 1.41                   | kinase        | Inhibited                  | 2.87               | 8.35E-10           |
| PAK2               | 0.48           | 1.39                   | kinase        | Inhibited                  | 2.14               | 5.61E-04           |
| IRAK1              | 0.46           | 1.38                   | kinase        | Inhibited                  | 2.46               | 8.17E-03           |
| MAP3K14            | 0.45           | 1.37                   | kinase        | Inhibited                  | 3.29               | 5.94E-06           |
| MAP2K3             | 0.43           | 1.35                   | kinase        | Inhibited                  | 3.04               | 7.86E-04           |
| TYK2               | 0.16           | 1.12                   | kinase        | Inhibited                  | 3.58               | 1.86E-05           |
| MAPK9              | 0.11           | 1.08                   | kinase        | Inhibited                  | 3.11               | 8.74E-05           |
| ROCK1              | 0.08           | 1.05                   | kinase        | Inhibited                  | 3.45               | 4.83E-07           |
| MAPK14             | 0.07           | 1.05                   | kinase        | Inhibited                  | 3.86               | 3.85E-16           |
| AKT1               | 0.05           | 1.04                   | kinase        | Inhibited                  | 2.50               | 1.31E-17           |
| IPMK               | 0.05           | 1.04                   | kinase        | Inhibited                  | 3.18               | 2.86E-03           |
| PRKCD              | 0.05           | 1.03                   | kinase        | Inhibited                  | 3.38               | 3.94E-09           |
| DYRK1A             | 0.04           | 1.03                   | kinase        | Inhibited                  | 2.44               | 3.40E-03           |
| PRKCE              | -0.13          | 0.91                   | kinase        | Inhibited                  | 2.73               | 2.21E-04           |
| ROR1               | -0.19          | 0.88                   | kinase        | Inhibited                  | 2.20               | 6.10E-03           |
| FGFR2              | -0.34          | 0.79                   | kinase        | Inhibited                  | 2.31               | 2.45E-08           |
| MAP3K1             | -0.35          | 0.79                   | kinase        | Inhibited                  | 2.22               | 7.86E-04           |
| IRAK4              | -0.46          | 0.73                   | kinase        | Inhibited                  | 2.12               | 4.36E-03           |
| MAPK3              | -0.48          | 0.72                   | kinase        | Inhibited                  | 2.57               | 3.04E-05           |
| MAP3K3             | -0.62          | 0.65                   | kinase        | Inhibited                  | 2.39               | 5.41E-06           |
| IKBKB              | -0.64          | 0.64                   | kinase        | Inhibited                  | 5.93               | 1.52E-18           |
| MKNK1              | -0.67          | 0.63                   | kinase        | Inhibited                  | 2.44               | 6.20E-04           |
| NEK6               | -0.84          | 0.56                   | kinase        | Inhibited                  | 2.00               | 3.35E-02           |
| JAK1               | -0.92          | 0.53                   | kinase        | Inhibited                  | 2.68               | 1.24E-02           |

**Table S5. Upstream regulators and inhibited cancer-associated kinases (ICAKs) identified in the poorly differentiated group.**

| Upstream Regulator | Expr Log Ratio | Expression (PDX vs PT) | Molecule Type | Predicted Activation State | Activation z-score | p-value of overlap |
|--------------------|----------------|------------------------|---------------|----------------------------|--------------------|--------------------|
| ERBB3              | 2.67           | 6.38                   | kinase        | Inhibited                  | 2.154              | 5.73E-13           |
| MST1R              | 2.21           | 4.62                   | kinase        | Inhibited                  | 2.449              | 3.81E-03           |
| MAP3K21            | 2.15           | 4.45                   | kinase        | Inhibited                  | 2                  | 1.46E-03           |
| EGFR               | 2.14           | 4.41                   | kinase        | Inhibited                  | 2.213              | 5.51E-06           |
| ERBB2              | 2.11           | 4.33                   | kinase        | Inhibited                  | 3.731              | 1.01E-11           |
| PRKCZ              | 1.57           | 2.97                   | kinase        | Inhibited                  | 2.774              | 1.75E-03           |
| TYRO3              | 1.44           | 2.71                   | kinase        | Inhibited                  | 2.412              | 2.30E-06           |
| PLK4               | 1.16           | 2.24                   | kinase        | Inhibited                  | 2.449              | 5.06E-03           |
| MET                | 1.16           | 2.24                   | kinase        | Inhibited                  | 4.548              | 2.48E-06           |
| BMPIA              | 0.90           | 1.86                   | kinase        | Inhibited                  | 2.207              | 1.31E-02           |
| PIK3CB             | 0.75           | 1.68                   | kinase        | Inhibited                  | 2.216              | 4.11E-04           |
| SRC                | 0.46           | 1.38                   | kinase        | Inhibited                  | 2.619              | 8.84E-10           |
| PRKCA              | 0.42           | 1.34                   | kinase        | Inhibited                  | 2.674              | 1.09E-03           |
| CHUK               | 0.40           | 1.32                   | kinase        | Inhibited                  | 5.426              | 3.62E-15           |
| EPHB4              | 0.39           | 1.31                   | kinase        | Inhibited                  | 2.764              | 4.37E-03           |
| IKBKB              | 0.32           | 1.25                   | kinase        | Inhibited                  | 5.692              | 3.33E-22           |
| IRAK1              | 0.19           | 1.14                   | kinase        | Inhibited                  | 2.036              | 1.03E-03           |
| PTK2               | 0.16           | 1.12                   | kinase        | Inhibited                  | 3.063              | 9.14E-09           |
| MAPK3              | 0.15           | 1.11                   | kinase        | Inhibited                  | 2.742              | 1.67E-06           |
| TBK1               | 0.05           | 1.03                   | kinase        | Inhibited                  | 3.575              | 1.67E-06           |
| MAP2K3             | 0.04           | 1.02                   | kinase        | Inhibited                  | 2.95               | 1.28E-04           |
| MAPK14             | 0.03           | 1.02                   | kinase        | Inhibited                  | 4.766              | 3.86E-18           |
| RAF1               | -0.05          | 0.97                   | kinase        | Inhibited                  | 3.985              | 1.27E-02           |
| RIPK3              | -0.07          | 0.95                   | kinase        | Inhibited                  | 2.4                | 2.01E-03           |
| MAP2K4             | -0.14          | 0.91                   | kinase        | Inhibited                  | 2.8                | 4.73E-02           |
| MAP2K1             | -0.20          | 0.87                   | kinase        | Inhibited                  | 4.861              | 6.11E-11           |
| CAMK2D             | -0.25          | 0.84                   | kinase        | Inhibited                  | 2                  | 1.05E-02           |
| PDK1               | -0.29          | 0.82                   | kinase        | Inhibited                  | 3.162              | 3.84E-02           |
| IPMK               | -0.35          | 0.78                   | kinase        | Inhibited                  | 3.742              | 4.75E-05           |

|               |       |      |        |           |       |          |
|---------------|-------|------|--------|-----------|-------|----------|
| <b>MAPK8</b>  | -0.42 | 0.75 | kinase | Inhibited | 2.244 | 2.47E-06 |
| <b>PRKCD</b>  | -0.43 | 0.74 | kinase | Inhibited | 2.78  | 9.99E-03 |
| <b>BRD4</b>   | -0.44 | 0.74 | kinase | Inhibited | 4.838 | 8.29E-09 |
| <b>MAP2K6</b> | -0.52 | 0.70 | kinase | Inhibited | 2.183 | 1.30E-08 |
| <b>MKNK1</b>  | -0.53 | 0.69 | kinase | Inhibited | 4.214 | 5.90E-05 |
| <b>AKT1</b>   | -0.56 | 0.68 | kinase | Inhibited | 4.292 | 1.15E-12 |
| <b>MAP3K1</b> | -0.59 | 0.67 | kinase | Inhibited | 2.477 | 4.20E-04 |
| <b>TYK2</b>   | -0.61 | 0.65 | kinase | Inhibited | 2.688 | 2.08E-06 |
| <b>CDK9</b>   | -0.62 | 0.65 | kinase | Inhibited | 2.415 | 2.95E-07 |
| <b>STK40</b>  | -0.63 | 0.65 | kinase | Inhibited | 3.138 | 7.79E-08 |
| <b>ROCK1</b>  | -0.64 | 0.64 | kinase | Inhibited | 3.719 | 3.41E-09 |
| <b>BMPR2</b>  | -0.81 | 0.57 | kinase | Inhibited | 2.413 | 2.62E-02 |
| <b>PLK2</b>   | -0.83 | 0.56 | kinase | Inhibited | 2.236 | 2.30E-02 |
| <b>PRKCE</b>  | -0.84 | 0.56 | kinase | Inhibited | 3.264 | 1.13E-02 |
| <b>IKBKG</b>  | -0.88 | 0.54 | kinase | Inhibited | 4.302 | 9.31E-07 |
| <b>JAK2</b>   | -0.88 | 0.54 | kinase | Inhibited | 2.201 | 8.79E-08 |



**Table S6. Genes differentially expressed in the co-culture model associated with overall survival.** The adjusted p-values were derived from Kaplan-Meier survival analysis using Cox proportional regression. Additionally, the log2 difference in expression in the co-culture is provided for each gene.

| Gene Symbol | Adjusted p-value | Log2 Fold Change in Expression in Co-culture |
|-------------|------------------|----------------------------------------------|
| SPOCD1      | 0.024            | 2.241128                                     |
| CAPRN2      | 4.95E-04         | 1.233663                                     |
| FAM109B     | 0.024            | 9.388593                                     |
| SERPINE2    | 8.43E-03         | 2.074787                                     |
| SCEL        | 0.019            | -1.55945                                     |
| VSTM2L      | 0.024            | 6.567292                                     |
| C16ORF45    | 1.30E-03         | 6.774376                                     |
| ANGPTL4     | 3.20E-05         | 1.230297                                     |

**Table S7. Differentially expressed genes identified by DESeq2 in KKU-M213-derived spheroids (monoculture vs co-culture).** Gene ID, name, adjusted p-value, and log2-fold change are provided for each gene.

Available for download at

<https://journals.biologists.com/dmm/article-lookup/doi/10.1242/dmm.050716#supplementary-data>

**Table S8. Inhibited cancer-associated kinases (ICAKs) activated in MSC co-cultures identified from whole PDX analysis.**

| Upstream Regulator | Expr Log Ratio | Expression (PDX vs PT) | Molecule Type | Predicted Activation State | Activation z-score | p-value of overlap |
|--------------------|----------------|------------------------|---------------|----------------------------|--------------------|--------------------|
| <b>EPHA2</b>       | -              |                        | -             | -                          | -                  | -                  |
| <b>MET</b>         | 0.01           | 1.00                   | kinase        | Activated                  | 3.39               | 2.68E-06           |
| <b>MST1R</b>       | -              |                        | -             | -                          | -                  | -                  |
| <b>MAP3K21</b>     | -0.27          | 0.83                   | kinase        |                            |                    | 6.63E-03           |
| <b>TYRO3</b>       | -              |                        | -             | -                          | -                  | -                  |
| <b>PRKCZ</b>       | -0.18          | 0.88                   | kinase        |                            | 1.98               | 4.50E-02           |
| <b>EIF2AK2</b>     | -              |                        | -             | -                          | -                  | -                  |
| <b>RET</b>         |                |                        | kinase        | Activated                  | 2.39               | 3.33E-05           |
| <b>CHUK</b>        | -0.01          | 0.99                   | kinase        | Activated                  | 3.06               | 2.57E-08           |
| <b>CDK6</b>        | -0.13          | 0.91                   | kinase        |                            | 1.89               | 1.72E-01           |
| <b>CAMK2D</b>      | -              |                        | -             | -                          | -                  | -                  |
| <b>CDK5</b>        | -              |                        | -             | -                          | -                  | -                  |
| <b>EPHB4</b>       | -              |                        | -             | -                          | -                  | -                  |
| <b>PTK2</b>        | 0.05           | 1.04                   | kinase        | Activated                  | 2.39               | 9.84E-08           |
| <b>PAK1</b>        | -              |                        | -             | -                          | -                  | -                  |
| <b>IRAK1</b>       | 0.09           | 1.06                   | kinase        |                            | 0.72               | 3.02E-02           |
| <b>TBK1</b>        | -              |                        | -             | -                          | -                  | -                  |
| <b>PDK1</b>        | -              |                        | -             | -                          | -                  | -                  |
| <b>MAP2K3</b>      | 0.08           | 1.05                   | kinase        |                            | 1.98               | 3.86E-06           |
| <b>MAP2K1</b>      | 0.01           | 1.01                   | kinase        | Activated                  | 2.30               | 7.77E-07           |
| <b>RIPK2</b>       | -              |                        | -             | -                          | -                  | -                  |
| <b>MAPK8</b>       | -0.15          | 0.90                   | kinase        |                            | 0.96               | 1.41E-04           |
| <b>MAPK9</b>       | -              |                        | -             | -                          | -                  | -                  |
| <b>MAPK14</b>      | 0.14           | 1.10                   | kinase        |                            | 1.71               | 3.27E-04           |
| <b>PRKACA</b>      | -              |                        | -             | -                          | -                  | -                  |
| <b>HK2</b>         | -0.82          | 0.57                   | kinase        | Activated                  | 2.22               | 1.06E-03           |
| <b>IKBKG</b>       | 0.04           | 1.03                   | kinase        | Activated                  | 2.68               | 7.10E-06           |
| <b>SRC</b>         | 0.08           | 1.05                   | kinase        |                            | 1.41               | 1.58E-06           |
| <b>RPS6KA5</b>     | -              |                        | -             | -                          | -                  | -                  |

|                |       |      |        |           |      |          |
|----------------|-------|------|--------|-----------|------|----------|
| <b>MAPK11</b>  | -     |      | -      | -         | -    | -        |
| <b>RAF1</b>    | -     |      | -      | -         | -    | -        |
| <b>IPMK</b>    | -0.26 | 0.84 | kinase |           | 1.22 | 7.53E-03 |
| <b>PRKCD</b>   | -0.19 | 0.88 | kinase | Activated | 2.47 | 7.00E-04 |
| <b>TYK2</b>    | -     |      | -      | -         | -    | -        |
| <b>CDK9</b>    | 0.06  | 1.04 | kinase |           |      | 8.52E-03 |
| <b>AKT1</b>    | 0.46  | 1.38 | kinase | Activated | 3.03 | 1.44E-06 |
| <b>MAPK3</b>   | -     |      | -      | -         | -    | -        |
| <b>ROCK1</b>   | 0.20  | 1.15 | kinase | Activated | 3.44 | 1.98E-09 |
| <b>IKBKB</b>   | 0.14  | 1.10 | kinase | Activated | 3.29 | 3.05E-10 |
| <b>MAP3K14</b> | 0.17  | 1.12 | kinase | Activated | 2.56 | 1.95E-04 |
| <b>DYRK1A</b>  | -     |      | -      | -         | -    | -        |
| <b>PRKCE</b>   | -0.22 | 0.86 | kinase | Activated | 2.60 | 1.05E-02 |
| <b>MAP3K1</b>  | -0.28 | 0.82 | kinase | Activated | 2.00 | 8.52E-03 |
| <b>MKNK1</b>   | -0.12 | 0.92 | kinase | Activated | 2.16 | 2.71E-03 |
| <b>ROR1</b>    | 0.27  | 1.20 | kinase | Activated | 2.76 | 1.58E-03 |
| <b>CAMK4</b>   | -     |      | -      | -         | -    | -        |

**Table S9. Inhibited cancer-associated kinases (ICAKs) activated in MSC co-cultures identified from well-differentiated PDXs.**

| Upstream Regulator | Expr Log Ratio | Expression (PDX vs PT) | Molecule Type | Predicted Activation State | Activation z-score | p-value of overlap |
|--------------------|----------------|------------------------|---------------|----------------------------|--------------------|--------------------|
| ERBB3              | -1.07          |                        | kinase        | Activated                  | 2.10               | 7.66E-11           |
| MST1R              | -              | 1.00                   | -             | -                          | -                  | -                  |
| MAP3K21            | -0.27          |                        | kinase        |                            |                    | 6.63E-03           |
| EGFR               | -0.10          | 0.83                   | kinase        | Activated                  | 2.73               | 9.69E-06           |
| ERBB2              | -0.29          |                        | kinase        | Activated                  | 2.75               | 1.92E-21           |
| PRKCZ              | -0.18          | 0.88                   | kinase        |                            | 1.98               | 4.50E-02           |
| TYRO3              | -              |                        | -             | -                          | -                  | -                  |
| PLK4               | -              |                        | -             | -                          | -                  | -                  |
| MET                | 0.01           | 0.99                   | kinase        | Activated                  | 3.39               | 2.68E-06           |
| BMPRI1A            | -0.17          | 0.91                   | kinase        |                            | 0.56               | 1.55E-03           |
| PIK3CB             | -              |                        | -             | -                          | -                  | -                  |
| SRC                | 0.08           |                        | kinase        |                            | 1.41               | 1.58E-06           |
| PRKCA              | -              |                        | -             | -                          | -                  | -                  |
| CHUK               | -0.01          | 1.04                   | kinase        | Activated                  | 3.06               | 2.57E-08           |
| EPHB4              | -              |                        | -             | -                          | -                  | -                  |
| IKBKB              | 0.14           | 1.06                   | kinase        | Activated                  | 3.29               | 3.05E-10           |
| IRAK1              | 0.09           |                        | kinase        |                            | 0.72               | 3.02E-02           |
| PTK2               | 0.05           |                        | kinase        | Activated                  | 2.39               | 9.84E-08           |
| MAPK3              | -              | 1.05                   | -             | -                          | -                  | -                  |
| TBK1               | -              | 1.01                   | -             | -                          | -                  | -                  |
| MAP2K3             | 0.08           |                        | kinase        |                            | 1.98               | 3.86E-06           |
| MAPK14             | 0.14           | 0.90                   | kinase        |                            | 1.71               | 3.27E-04           |
| RAF1               | -              |                        | -             | -                          | -                  | -                  |
| RIPK3              | 0.15           | 1.10                   | kinase        |                            |                    | 4.10E-02           |
| MAP2K4             | -              |                        | -             | -                          | -                  | -                  |
| MAP2K1             | 0.01           | 0.57                   | kinase        | Activated                  | 2.30               | 7.77E-07           |
| CAMK2D             | -              | 1.03                   | -             | -                          | -                  | -                  |
| PDK1               | -              | 1.05                   | -             | -                          | -                  | -                  |
| IPMK               | -0.26          |                        | kinase        |                            | 1.22               | 7.53E-03           |

|               |       |      |        |           |      |          |
|---------------|-------|------|--------|-----------|------|----------|
| <b>MAPK8</b>  | -0.15 |      | kinase |           | 0.96 | 1.41E-04 |
| <b>PRKCD</b>  | -0.19 |      | kinase | Activated | 2.47 | 7.00E-04 |
| <b>BRD4</b>   |       | 0.84 | kinase | Activated | 3.50 | 7.45E-07 |
| <b>MAP2K6</b> | -0.79 | 0.88 | kinase |           | 1.69 | 3.20E-04 |
| <b>MKNK1</b>  | -0.12 |      | kinase | Activated | 2.16 | 2.71E-03 |
| <b>AKT1</b>   | 0.46  | 1.04 | kinase | Activated | 3.03 | 1.44E-06 |
| <b>MAP3K1</b> | -0.28 | 1.38 | kinase | Activated | 2.00 | 8.52E-03 |
| <b>TYK2</b>   | -     |      | -      | -         | -    | -        |
| <b>CDK9</b>   | 0.06  | 1.15 | kinase |           |      | 8.52E-03 |
| <b>STK40</b>  | -0.06 | 1.10 | kinase |           | 1.16 | 2.71E-04 |
| <b>ROCK1</b>  | 0.20  | 1.12 | kinase | Activated | 3.44 | 1.98E-09 |
| <b>BMPR2</b>  | 1.70  |      | kinase |           | 1.13 | 3.87E-02 |
| <b>PLK2</b>   | -     | 0.86 | -      | -         | -    | -        |
| <b>PRKCE</b>  | -0.22 | 0.82 | kinase | Activated | 2.60 | 1.05E-02 |
| <b>IKBKG</b>  | 0.04  | 0.92 | kinase | Activated | 2.68 | 7.10E-06 |
| <b>JAK2</b>   | 0.35  | 1.20 | kinase |           | 1.73 | 3.65E-03 |

**Table S10. Inhibited cancer-associated kinases (ICAKs) activated in MSC co-cultures identified from poorly-differentiated PDXs.**

| Upstream Regulator | Expr Log Ratio | Expression (PDX vs PT) | Molecule Type | Predicted Activation State | Activation z-score | p-value of overlap |
|--------------------|----------------|------------------------|---------------|----------------------------|--------------------|--------------------|
| ACVR1C             | -1.32          |                        | kinase        | Activated                  | 2.61               | 2.94E-04           |
| RET                |                | 1.00                   | kinase        | Activated                  | 2.39               | 3.33E-05           |
| HK2                | -0.82          |                        | kinase        | Activated                  | 2.22               | 1.06E-03           |
| TYRO3              | -              | 0.83                   | -             | -                          | -                  | -                  |
| CAMK2D             | -              |                        | -             | -                          | -                  | -                  |
| CHUK               | -0.01          | 0.88                   | kinase        | Activated                  | 3.06               | 2.57E-08           |
| PRKCZ              | -0.18          |                        | kinase        |                            | 1.98               | 4.50E-02           |
| CAMK4              | -              |                        | -             | -                          | -                  | -                  |
| RIPK2              | -              | 0.99                   | -             | -                          | -                  | -                  |
| MAPK11             | -              | 0.91                   | -             | -                          | -                  | -                  |
| CDK5               | -              |                        | -             | -                          | -                  | -                  |
| PDK1               | -              |                        | -             | -                          | -                  | -                  |
| PTK2               | 0.05           |                        | kinase        | Activated                  | 2.39               | 9.84E-08           |
| IKBKG              | 0.04           | 1.04                   | kinase        | Activated                  | 2.68               | 7.10E-06           |
| EPHB4              | -              |                        | -             | -                          | -                  | -                  |
| PRKACA             | -              | 1.06                   | -             | -                          | -                  | -                  |
| MAP2K1             | 0.01           |                        | kinase        | Activated                  | 2.30               | 7.77E-07           |
| MAPK8              | -0.15          |                        | kinase        |                            | 0.96               | 1.41E-04           |
| PAK2               | -0.06          | 1.05                   | kinase        |                            | 0.45               | 1.64E-02           |
| IRAK1              | 0.09           | 1.01                   | kinase        |                            | 0.72               | 3.02E-02           |
| MAP3K14            | 0.17           |                        | kinase        | Activated                  | 2.56               | 1.95E-04           |
| MAP2K3             | 0.08           | 0.90                   | kinase        |                            | 1.98               | 3.86E-06           |
| TYK2               | -              |                        | -             | -                          | -                  | -                  |
| MAPK9              | -              | 1.10                   | -             | -                          | -                  | -                  |
| ROCK1              | 0.20           |                        | kinase        | Activated                  | 3.44               | 1.98E-09           |
| MAPK14             | 0.14           | 0.57                   | kinase        |                            | 1.71               | 3.27E-04           |
| AKT1               | 0.46           | 1.03                   | kinase        | Activated                  | 3.03               | 1.44E-06           |
| IPMK               | -0.26          | 1.05                   | kinase        |                            | 1.22               | 7.53E-03           |
| PRKCD              | -0.19          |                        | kinase        | Activated                  | 2.47               | 7.00E-04           |

|               |       |      |        |           |       |          |
|---------------|-------|------|--------|-----------|-------|----------|
| <b>DYRK1A</b> | -     |      | -      | -         | -     | -        |
| <b>PRKCE</b>  | -0.22 |      | kinase | Activated | 2.60  | 1.05E-02 |
| <b>ROR1</b>   | 0.27  | 0.84 | kinase | Activated | 2.76  | 1.58E-03 |
| <b>FGFR2</b>  | -0.49 | 0.88 | kinase |           | -0.08 | 4.77E-07 |
| <b>MAP3K1</b> | -0.28 |      | kinase | Activated | 2.00  | 8.52E-03 |
| <b>IRAK4</b>  | -     | 1.04 | -      | -         | -     | -        |
| <b>MAPK3</b>  | -     | 1.38 | -      | -         | -     | -        |
| <b>MAP3K3</b> | 0.46  |      | kinase |           |       | 3.98E-03 |
| <b>IKBKB</b>  | 0.14  | 1.15 | kinase | Activated | 3.29  | 3.05E-10 |
| <b>MKNK1</b>  | -0.12 | 1.10 | kinase | Activated | 2.16  | 2.71E-03 |
| <b>NEK6</b>   | -     | 1.12 | -      | -         | -     | -        |
| <b>JAK1</b>   | 0.40  |      | kinase | Activated | 2.80  | 2.71E-03 |
